# Supplementary material for: Dam Body Condition Score Alters Offspring Circulating Cortisol and Energy Metabolites in Holstein Calves but Did Not Affect Neonatal Leptin Surge
Source: MDPI journal article supplement (doi:10.3390/metabo13050631), 2023-05-06
Supplement: s1 [file s1]

**Supplemental Table S1.** Least square means and 95% confidence intervals of blood metabolites in female Holstein calves by neonatal day of age.

| Day | $\beta$ -hydroxybutyrate, mM |                | Blood urea nitrogen, mg/dL |              | Triglyceride, mg/dL |              |
|-----|------------------------------|----------------|----------------------------|--------------|---------------------|--------------|
| 0   | 0.083                        | [0.066, 0.116] | 11.8                       | [10.3, 13.3] | 27.4                | [24.9, 30.4] |
| 1   | 0.091                        | [0.072, 0.115] | 12.0                       | [10.5, 13.6] | 23.2                | [21.3, 25.3] |
| 2   | 0.110                        | [0.086, 0.140] | 10.2                       | [8.8, 11.7]  | 26.9                | [24.6, 22.6] |
| 5   | 0.071                        | [0.056, 0.090] | 9.1                        | [7.8, 10.5]  | 20.9                | [19.5, 22.6] |

**Supplemental Table S2.** Least square means and 95% confidence intervals of blood metabolites in female Angus x Holstein calves by neonatal day of age.

| Day | $\beta$ -hydroxybutyrate, mM | Urea nitrogen, mg/dL | Cortisol, mg/dL   | Free fatty acids, mM | Leptin, ng/mL   | Triglyceride, mg/dL | Total protein, g/dL |
|-----|------------------------------|----------------------|-------------------|----------------------|-----------------|---------------------|---------------------|
| 0   | 0.108 [0.085, 0.131]         | 9.3 [7.3, 11.5]      | 66.3 [54.7, 79.1] | 0.90 [0.76, 1.05]    | 9.2 [8.2, 10.6] | 29.9 [25.3, 38.4]   | 5.1 [4.8, 5.5]      |
| 1   | 0.075 [0.053, 0.098]         | 8.0 [6.2, 10.1]      | 23.5 [16.9, 31.3] | 0.33 [0.24, 0.42]    | 7.3 [6.8, 8.0]  | 26.1 [31.2, 22.9]   | 8.3 [7.9, 8.6]      |
| 2   | 0.062 [0.040, 0.084]         | 6.8 [5.1, 8.8]       | 27.4 [20.2, 35.8] | 0.28 [0.20, 0.36]    | 7.1 [6.6, 7.6]  | 26.5 [23.2, 31.9]   | 8.0 [7.6, 8.3]      |
| 3   | -                            | -                    | 20.5 [14.3, 27.8] | -                    | 6.9 [6.5, 7.4]  | -                   | -                   |
| 5   | 0.053 [0.030, 0.076]         | 7.6 [5.8, 9.6]       | 19.3 [13.3, 26.4] | 0.28 [0.21, 0.37]    | 6.5 [6.1, 6.8]  | 21.3 [19.4, 23.9]   | 7.4 [7.1, 8.0]      |
| 7   | -                            | -                    | 14.4 [9.3, 20.6]  | -                    | 6.4 [6.1, 6.8]  | -                   | -                   |
